# Supplementary material for: External facilitators and interprofessional facilitation teams: a qualitative study of their roles in supporting practice change
Source: Springer Nature journal article supplement (doi:10.1186/s13012-016-0458-7), 2015-12-01
Supplement: MOESM1 [file 10496360]

## ADDITIONAL FILE 1:

### Facilitation activities performed by appointed facilitators, by Dogherty *et al.*, 2012

Lessard S, Bareil C, Lalonde L, Duhamel F, Hudon E, Goudreau J, Lévesque L: **External facilitators and interprofessional facilitation teams: a qualitative study of their roles in supporting practice change**

| <b>Planning for change</b>                                                                                                                                                                                                                                                                                                                                                                                                                                                                                                                                                                                                             |                                                                                                                                                                                                                                                                                                                                                                                                                                                                                                                                          |
|----------------------------------------------------------------------------------------------------------------------------------------------------------------------------------------------------------------------------------------------------------------------------------------------------------------------------------------------------------------------------------------------------------------------------------------------------------------------------------------------------------------------------------------------------------------------------------------------------------------------------------------|------------------------------------------------------------------------------------------------------------------------------------------------------------------------------------------------------------------------------------------------------------------------------------------------------------------------------------------------------------------------------------------------------------------------------------------------------------------------------------------------------------------------------------------|
| <p><i>Increasing awareness</i></p> <ol style="list-style-type: none"> <li>1) Highlighting a need for practice change</li> <li>2) Selecting an area for change relevant to staff/recognized as a priority</li> <li>3) Stimulating critical inquiry and assisting groups to develop/refine specific clinical practice questions</li> <li>4) Assisting with/performing a formal/informal practice audit</li> <li>5) Interpreting baseline data and providing feedback/insight into performance gaps</li> <li>6) Emphasizing enhanced patient outcomes as opposed to poor practice as reason for change</li> </ol>                         | <p><i>Developing a plan</i></p> <ol style="list-style-type: none"> <li>7) Goal-setting and assisting with development of an action plan</li> <li>8) Helping identify and determine solutions to address potential barriers to EBP</li> <li>9) Displaying and generating enthusiasm at the start of the project</li> <li>10) Thinking ahead in the process</li> </ol>                                                                                                                                                                     |
| <b>Leading and managing change</b>                                                                                                                                                                                                                                                                                                                                                                                                                                                                                                                                                                                                     |                                                                                                                                                                                                                                                                                                                                                                                                                                                                                                                                          |
| <p><i>Knowledge and data management</i></p> <ol style="list-style-type: none"> <li>11) Knowledge translation/dissemination (assisting with conducting literature searches, obtaining articles, appraising and summarizing the evidence)</li> <li>12) Helping to interpret the research and apply it in practice</li> <li>13) Providing resources/tools for change</li> </ol>                                                                                                                                                                                                                                                           | <p><i>Project management</i></p> <ol style="list-style-type: none"> <li>14) Identifying a leader</li> <li>15) Establishing and allocating roles/delegating responsibilities</li> <li>16) Advocating for resources and change</li> </ol>                                                                                                                                                                                                                                                                                                  |
| <p><i>Recognizing the importance of context</i></p> <ol style="list-style-type: none"> <li>17) Creating an open, supportive, and trusting environment conducive to change</li> <li>18) Helping to build in the structures/processes to support staff and help them overcome obstacles</li> <li>19) Creating local ownership of change</li> <li>20) Assisting with adapting evidence to the local context</li> <li>21) Boundary-spanning (addressing organizational systems/culture), managing the different requirements of each discipline/role</li> <li>22) Tailoring/adapting facilitation services to the local setting</li> </ol> | <p><i>Fostering team-building/group dynamics</i></p> <ol style="list-style-type: none"> <li>23) Relationship-building</li> <li>24) Encouraging effective teamwork</li> <li>25) Enabling individual and group development</li> <li>26) Encouraging/ensuring adequate participation</li> <li>27) Increasing awareness of and helping overcome resistance to change</li> <li>28) Consensus-building (shared decision-making)</li> </ol>                                                                                                     |
| <p><i>Administrative and project-specific support</i></p> <ol style="list-style-type: none"> <li>29) Organizing/scheduling meetings</li> <li>30) Leading/participating in meetings</li> <li>31) Gathering information and assembling/distributing reports and materials</li> </ol>                                                                                                                                                                                                                                                                                                                                                     | <ol style="list-style-type: none"> <li>32) General planning</li> <li>33) Providing skills training</li> <li>34) Taking on specific tasks</li> </ol>                                                                                                                                                                                                                                                                                                                                                                                      |
| <b>Monitoring progress and ongoing implementation</b>                                                                                                                                                                                                                                                                                                                                                                                                                                                                                                                                                                                  |                                                                                                                                                                                                                                                                                                                                                                                                                                                                                                                                          |
| <p><i>Problem-solving</i></p> <ol style="list-style-type: none"> <li>35) Problem-solving and addressing specific issues</li> <li>36) Making changes to the developed plan as necessary</li> <li>37) Networking</li> </ol>                                                                                                                                                                                                                                                                                                                                                                                                              | <p><i>Providing support</i></p> <ol style="list-style-type: none"> <li>38) Mentoring and role-modelling EBP</li> <li>39) Maintaining momentum and enthusiasm</li> <li>40) Acknowledging ideas and efforts</li> <li>41) Providing ongoing support/reassurance and constructive feedback</li> <li>42) Empowering group members</li> <li>43) Providing advice/guidance/assistance</li> <li>44) Being available as needed</li> <li>45) Ensuring group remains on task and things are not missed (process/methodology is followed)</li> </ol> |
| <p><i>Effective communication</i></p> <ol style="list-style-type: none"> <li>46) Providing regular communication (emails, phone calls)</li> <li>47) Keeping group members informed</li> <li>48) Acting as a liaison</li> </ol>                                                                                                                                                                                                                                                                                                                                                                                                         |                                                                                                                                                                                                                                                                                                                                                                                                                                                                                                                                          |
| <b>Evaluating change</b>                                                                                                                                                                                                                                                                                                                                                                                                                                                                                                                                                                                                               |                                                                                                                                                                                                                                                                                                                                                                                                                                                                                                                                          |
| <p><i>Assessment</i></p> <ol style="list-style-type: none"> <li>49) Performing/assisting with evaluation</li> <li>50) Linking evidence implementation to patient outcomes</li> <li>51) Acknowledging success, recognizing and celebrating achievements</li> </ol>                                                                                                                                                                                                                                                                                                                                                                      |                                                                                                                                                                                                                                                                                                                                                                                                                                                                                                                                          |

Source: Dogherty EJ, Harrison MB, Baker C, Graham ID: **Following a natural experiment of guideline adaptation and early implementation: a mixed-methods study of facilitation.** *Implementation Science* 2012
