# Supplementary material for: External facilitators and interprofessional facilitation teams: a qualitative study of their roles in supporting practice change
Source: Springer Nature journal article supplement (doi:10.1186/s13012-016-0458-7), 2015-12-01
Supplement: MOESM2 [file 10496360]

## Additional file 2: Facilitation role categories and roles, by fields of expertise

Lessard S, Bareil C, Lalonde L, Duhamel F, Hudon E, Goudreau J, Lévesque L: **External facilitators and interprofessional facilitation teams: a qualitative study of their roles in supporting practice change**

| <b>A) Implementation-oriented facilitation roles</b>                            |                                                                                                                                                                                                                                                                                                                                                                                                                                                                                                                            |                                                                                                                                                                                                                                                                                                                                                                                                                                                                                                                                                                                                                                     |                                                                                                                                                                                                                                                                                                |
|---------------------------------------------------------------------------------|----------------------------------------------------------------------------------------------------------------------------------------------------------------------------------------------------------------------------------------------------------------------------------------------------------------------------------------------------------------------------------------------------------------------------------------------------------------------------------------------------------------------------|-------------------------------------------------------------------------------------------------------------------------------------------------------------------------------------------------------------------------------------------------------------------------------------------------------------------------------------------------------------------------------------------------------------------------------------------------------------------------------------------------------------------------------------------------------------------------------------------------------------------------------------|------------------------------------------------------------------------------------------------------------------------------------------------------------------------------------------------------------------------------------------------------------------------------------------------|
| <b>Roles Themes</b>                                                             | <b>Fields of expertise</b>                                                                                                                                                                                                                                                                                                                                                                                                                                                                                                 |                                                                                                                                                                                                                                                                                                                                                                                                                                                                                                                                                                                                                                     |                                                                                                                                                                                                                                                                                                |
|                                                                                 | <b>Change management (CM)</b>                                                                                                                                                                                                                                                                                                                                                                                                                                                                                              | <b>Combination of CM+PM</b>                                                                                                                                                                                                                                                                                                                                                                                                                                                                                                                                                                                                         | <b>Project management (PM)</b>                                                                                                                                                                                                                                                                 |
| <b>A1. Legitimation of change/project</b>                                       | a) Highlighting a need for change <sup>1</sup><br>b) Displaying and generating enthusiasm about the project <sup>1</sup><br>c) Emphasizing the benefits of change for people involved as opposed to poor practice as reason for change <sup>1</sup>                                                                                                                                                                                                                                                                        | d) Assisting with/performing a formal/informal audit to gather baseline data <sup>1</sup><br>e) Interpreting baseline data and providing feedback/insight into performance gaps <sup>1</sup><br>f) Selecting area(s) for change relevant to staff/recognized as a priority <sup>1</sup>                                                                                                                                                                                                                                                                                                                                             |                                                                                                                                                                                                                                                                                                |
| <b>A2. Formation of a powerful guiding coalition<sup>4</sup></b>                | a) Presenting change team members to the organization                                                                                                                                                                                                                                                                                                                                                                                                                                                                      | b) Identifying a leader <sup>1</sup><br>c) Advocating for resources and change <sup>1</sup>                                                                                                                                                                                                                                                                                                                                                                                                                                                                                                                                         |                                                                                                                                                                                                                                                                                                |
| <b>A3. Communication of vision of change<sup>4</sup> and project guidelines</b> | a) Mentoring and role-modelling project-related practices <sup>1</sup><br>b) Using storytelling                                                                                                                                                                                                                                                                                                                                                                                                                            | c) Knowledge translation/dissemination (assisting with conducting literature searches, obtaining articles, appraising and summarizing the evidence) <sup>1</sup><br>d) Assembling/distributing information about vision and strategies<br>e) Helping to interpret the project <sup>1</sup>                                                                                                                                                                                                                                                                                                                                          |                                                                                                                                                                                                                                                                                                |
| <b>A4. Empowerment of others to act towards change<sup>1,4</sup></b>            | a) Helping to build in the structures/processes to support staff and help them overcome obstacles <sup>1</sup><br>b) Creating local ownership of change <sup>1</sup><br>c) Networking <sup>1</sup><br>d) Assisting with adapting project requirements to the local context <sup>1</sup><br>e) Increasing awareness of and helping overcome resistance to change <sup>1</sup><br>f) Boundary-spanning (addressing organizational systems/culture), managing the different requirements of each discipline/role <sup>1</sup> | g) Establishing and allocating roles/delegating responsibilities <sup>1</sup><br>h) Providing resources/tools for change <sup>1</sup><br>i) Sharing ideas across project sites<br>j) Providing advice/guidance/assistance <sup>1</sup><br>k) Problem-solving and addressing specific issues <sup>1</sup><br>l) Bringing problems reported off-meeting back to the group<br>m) Acting as a liaison <sup>1</sup><br>n) Providing skills training <sup>1</sup><br>o) Being available as needed <sup>1</sup><br>p) Meeting actors of change outside regular meetings<br>q) Establishing political links with / influencing stakeholders |                                                                                                                                                                                                                                                                                                |
| <b>A5. Application of PDSA cycle (plan-do-study-act)<sup>5,6</sup></b>          |                                                                                                                                                                                                                                                                                                                                                                                                                                                                                                                            | a) Stimulating critical inquiry and assisting group to develop/refine specific project-related questions <sup>1</sup><br>b) Goal-setting and assisting with development of an action plan <sup>1</sup><br>c) Helping identify and determine solutions to address potential barriers to project/change implementation <sup>1</sup><br>d) Considering the bigger picture (impact on other unit sites, legal aspects, etc.)<br>e) Thinking ahead in the process <sup>1</sup>                                                                                                                                                           | m) Leading the project<br>n) Ensuring group remains on task and things are not missed <sup>1</sup><br>o) Discussing specific cases/experiences within the scope of the project<br>p) Linking implementation actions to outcomes <sup>1</sup><br>q) Keeping group members informed <sup>1</sup> |

Legend: Inspired/adapted from <sup>1</sup> Dogherly *et al.* (2012), <sup>2</sup> Heron (1999), <sup>3</sup> Kolb *et al.* (2008), <sup>4</sup> Kotter (2007), <sup>5</sup> Nagykaldi *et al.* (2005), <sup>6</sup> Young (2009)

| <b>A) Implementation-oriented facilitation roles</b>                |                                                                                                                                                                                                                                                                                                               |                                                                                                                                                                                                                                                                                                                                                                                                                                                                                                                                                                    |                                                                                                                                                                                                                                                                                                                                                                                            |
|---------------------------------------------------------------------|---------------------------------------------------------------------------------------------------------------------------------------------------------------------------------------------------------------------------------------------------------------------------------------------------------------|--------------------------------------------------------------------------------------------------------------------------------------------------------------------------------------------------------------------------------------------------------------------------------------------------------------------------------------------------------------------------------------------------------------------------------------------------------------------------------------------------------------------------------------------------------------------|--------------------------------------------------------------------------------------------------------------------------------------------------------------------------------------------------------------------------------------------------------------------------------------------------------------------------------------------------------------------------------------------|
|                                                                     |                                                                                                                                                                                                                                                                                                               | <ul style="list-style-type: none"> <li>f) Gathering information and assembling/distributing reports and materials<sup>1</sup></li> <li>g) Providing regular communication (emails, phone calls)<sup>1</sup></li> <li>h) Performing/assisting with evaluation about implementation aspects<sup>1</sup></li> <li>i) Making changes to the developed plan as necessary<sup>1</sup></li> <li>j) Taking on specific tasks<sup>1</sup></li> <li>k) Asking for/acknowledging feedback about implementation</li> <li>l) Providing feedback about implementation</li> </ul> |                                                                                                                                                                                                                                                                                                                                                                                            |
| <b>A6. Consolidation and continuity of improvements<sup>4</sup></b> |                                                                                                                                                                                                                                                                                                               | <ul style="list-style-type: none"> <li>a) Reflecting/planning on the "after-project" to consolidate improvements and institutionalize changes<sup>4</sup></li> </ul>                                                                                                                                                                                                                                                                                                                                                                                               |                                                                                                                                                                                                                                                                                                                                                                                            |
| <b>B) Support-oriented facilitation roles</b>                       |                                                                                                                                                                                                                                                                                                               |                                                                                                                                                                                                                                                                                                                                                                                                                                                                                                                                                                    |                                                                                                                                                                                                                                                                                                                                                                                            |
| Roles Themes                                                        | <i>Fields of expertise</i>                                                                                                                                                                                                                                                                                    |                                                                                                                                                                                                                                                                                                                                                                                                                                                                                                                                                                    |                                                                                                                                                                                                                                                                                                                                                                                            |
|                                                                     | <i>Meeting management (MM)</i>                                                                                                                                                                                                                                                                                | <i>Combination of MM+GID</i>                                                                                                                                                                                                                                                                                                                                                                                                                                                                                                                                       | <i>Group and interpersonal dynamics (GID)</i>                                                                                                                                                                                                                                                                                                                                              |
| <b>B1. Management of effective meetings</b>                         | <ul style="list-style-type: none"> <li>a) Organizing/scheduling meetings<sup>1</sup></li> <li>b) Preparing meeting agenda and minutes</li> <li>c) General administrative planning<sup>1</sup></li> <li>d) Leading/participating in meetings<sup>1</sup></li> <li>e) Performing meeting evaluations</li> </ul> | <ul style="list-style-type: none"> <li>f) Tailoring/adapting facilitation services to the local setting<sup>1</sup></li> <li>g) Encouraging/ensuring adequate participation during meetings<sup>1</sup></li> <li>h) Establishing ground rules<sup>3</sup></li> <li>i) Assigning meeting maintenance roles</li> <li>j) Promoting consensus-building (shared decision-making)<sup>1</sup></li> </ul>                                                                                                                                                                 | <ul style="list-style-type: none"> <li>k) Listening actively, clarifying and summarizing the information</li> </ul>                                                                                                                                                                                                                                                                        |
| <b>B2. Enablement of relationship building<sup>1</sup></b>          |                                                                                                                                                                                                                                                                                                               |                                                                                                                                                                                                                                                                                                                                                                                                                                                                                                                                                                    | <ul style="list-style-type: none"> <li>a) Welcoming/engaging new members in the team</li> <li>b) Building relationships<sup>1</sup></li> </ul>                                                                                                                                                                                                                                             |
| <b>B3. Handling of individual/group emotional life<sup>2</sup></b>  |                                                                                                                                                                                                                                                                                                               | <ul style="list-style-type: none"> <li>a) Reporting/Managing conflict</li> </ul>                                                                                                                                                                                                                                                                                                                                                                                                                                                                                   | <ul style="list-style-type: none"> <li>b) Creating an open, supportive, and trusting environment conducive to change<sup>1</sup></li> <li>c) Observing group members' behaviors</li> <li>d) Providing ongoing support/reassurance and constructive feedback<sup>1</sup></li> </ul>                                                                                                         |
| <b>B4. Encouragement</b>                                            |                                                                                                                                                                                                                                                                                                               |                                                                                                                                                                                                                                                                                                                                                                                                                                                                                                                                                                    | <ul style="list-style-type: none"> <li>a) Maintaining momentum and enthusiasm<sup>1</sup></li> <li>b) Acknowledging ideas and efforts<sup>1</sup></li> <li>c) Encouraging effective teamwork<sup>1</sup></li> <li>d) Sharing benchmarking results from multiple sites to encourage team</li> <li>e) Acknowledging success, recognizing and celebrating achievements<sup>1</sup></li> </ul> |
| <b>B5. Enablement of individual/group development<sup>1</sup></b>   |                                                                                                                                                                                                                                                                                                               |                                                                                                                                                                                                                                                                                                                                                                                                                                                                                                                                                                    | <ul style="list-style-type: none"> <li>a) Providing education, training, or coaching to develop individuals or group</li> </ul>                                                                                                                                                                                                                                                            |
