# Supplementary material for: External facilitators and interprofessional facilitation teams: a qualitative study of their roles in supporting practice change
Source: Springer Nature journal article supplement (doi:10.1186/s13012-016-0458-7), 2015-12-01
Supplement: MOESM4 [file 10496360]

#### Additional file 4:

### Facilitation roles by change agent and relationships involved in facilitation

Lessard S, Bareil C, Lalonde L, Duhamel F, Hudon E, Goudreau J, Lévesque L: **External facilitators and interprofessional facilitation teams: a qualitative study of their roles in supporting practice change**

| Table legend: Ref. Axx : Implementation-oriented facilitation roles<br>Ref. Bxx : Support-oriented facilitation roles<br><i>Italics</i> : Emerging role<br>■ Role directed towards the IFT<br>◆ Role directed towards the Family Medicine Group<br>❖ Role directed towards other external change agents (e.g. clinicians, health agencies, support groups)<br>● Role directed towards one or the other EF<br>📄 Role directed towards the Research Group |                                                                                                                                                  |                                            |     |
|---------------------------------------------------------------------------------------------------------------------------------------------------------------------------------------------------------------------------------------------------------------------------------------------------------------------------------------------------------------------------------------------------------------------------------------------------------|--------------------------------------------------------------------------------------------------------------------------------------------------|--------------------------------------------|-----|
| Ref. in add. file 2                                                                                                                                                                                                                                                                                                                                                                                                                                     | FACILITATION ROLES                                                                                                                               | CHANGE AGENT UNDERTAKING FACILITATION ROLE |     |
|                                                                                                                                                                                                                                                                                                                                                                                                                                                         |                                                                                                                                                  | EF                                         | IFT |
| A1a                                                                                                                                                                                                                                                                                                                                                                                                                                                     | Highlighting a need for change                                                                                                                   | ■◆❖                                        | ◆❖  |
| A1b                                                                                                                                                                                                                                                                                                                                                                                                                                                     | Displaying and generating enthusiasm about the project                                                                                           | ■                                          | ■   |
| A1c                                                                                                                                                                                                                                                                                                                                                                                                                                                     | Emphasizing the benefits of change for people involved as opposed to poor practice as reason for change                                          | ■                                          | ■◆  |
| A1d                                                                                                                                                                                                                                                                                                                                                                                                                                                     | Assisting with/performing a formal/informal practice audit to gather baseline data                                                               | 📄                                          | ■   |
| A1e                                                                                                                                                                                                                                                                                                                                                                                                                                                     | Interpreting baseline data and providing feedback/insight into performance gaps                                                                  | ■                                          | ◆   |
| A1f                                                                                                                                                                                                                                                                                                                                                                                                                                                     | Selecting an area for change relevant to staff/recognized as a priority                                                                          | ■                                          | ■   |
| A2a                                                                                                                                                                                                                                                                                                                                                                                                                                                     | <i>Presenting change team members to the organization</i>                                                                                        | ◆                                          | ◆   |
| A2b                                                                                                                                                                                                                                                                                                                                                                                                                                                     | Identifying a leader                                                                                                                             | ■                                          | ■   |
| A2c                                                                                                                                                                                                                                                                                                                                                                                                                                                     | Advocating for resources and change                                                                                                              | ■📄                                         | ■◆  |
| A3a                                                                                                                                                                                                                                                                                                                                                                                                                                                     | Mentoring and role-modelling project-related practices                                                                                           | ■◆                                         | ◆❖  |
| A3b                                                                                                                                                                                                                                                                                                                                                                                                                                                     | <i>Using storytelling</i>                                                                                                                        |                                            | ◆   |
| A3c                                                                                                                                                                                                                                                                                                                                                                                                                                                     | Knowledge translation/dissemination (assisting with conducting literature searches, obtaining articles, appraising and summarizing the evidence) | ■                                          | ■◆  |
| A3d                                                                                                                                                                                                                                                                                                                                                                                                                                                     | <i>Assembling/distributing information about vision and strategies</i>                                                                           | ■📄❖                                        | ◆❖  |
| A3e                                                                                                                                                                                                                                                                                                                                                                                                                                                     | Helping to interpret the project                                                                                                                 | ■◆❖                                        | ■◆❖ |
| A4a                                                                                                                                                                                                                                                                                                                                                                                                                                                     | Helping to build in the structures/processes to support staff and help them overcome obstacles                                                   | ■❖                                         | ■◆❖ |
| A4b                                                                                                                                                                                                                                                                                                                                                                                                                                                     | Creating local ownership of change                                                                                                               | ■                                          | ◆   |
| A4c                                                                                                                                                                                                                                                                                                                                                                                                                                                     | Networking                                                                                                                                       | ■❖                                         | ■❖  |
| A4d                                                                                                                                                                                                                                                                                                                                                                                                                                                     | Assisting with adapting project requirements to the local context                                                                                | ■                                          | ●■◆ |
| A4e                                                                                                                                                                                                                                                                                                                                                                                                                                                     | Increasing awareness of and helping overcome resistance to change                                                                                | ■◆❖                                        | ●◆❖ |
| A4f                                                                                                                                                                                                                                                                                                                                                                                                                                                     | Boundary-spanning (addressing organizational systems/culture), managing the different requirements of each discipline/role                       | ■                                          | ◆   |
| A4g                                                                                                                                                                                                                                                                                                                                                                                                                                                     | Establishing and allocating roles/delegating responsibilities                                                                                    | ■                                          | ■◆  |
| A4h                                                                                                                                                                                                                                                                                                                                                                                                                                                     | Providing resources/tools for change                                                                                                             | ■                                          | ●■◆ |
| A4i                                                                                                                                                                                                                                                                                                                                                                                                                                                     | <i>Sharing ideas across project sites</i>                                                                                                        | ■                                          | ■   |
| A4j                                                                                                                                                                                                                                                                                                                                                                                                                                                     | Providing advice/guidance/assistance                                                                                                             | ●■◆❖                                       | ●■  |

| Table legend: Ref. Axx : Implementation-oriented facilitation roles                                                                                                                                                                                                                                                                                                    |                                                                                                            |                                                           |         |
|------------------------------------------------------------------------------------------------------------------------------------------------------------------------------------------------------------------------------------------------------------------------------------------------------------------------------------------------------------------------|------------------------------------------------------------------------------------------------------------|-----------------------------------------------------------|---------|
| Ref. Bxx : Support-oriented facilitation roles                                                                                                                                                                                                                                                                                                                         |                                                                                                            |                                                           |         |
| <i>Italics</i> : Emerging role                                                                                                                                                                                                                                                                                                                                         |                                                                                                            |                                                           |         |
| <ul style="list-style-type: none"> <li>■ Role directed towards the IFT</li> <li>◆ Role directed towards the Family Medicine Group</li> <li>❖ Role directed towards other external change agents (e.g. clinicians, health agencies, support groups)</li> <li>● Role directed towards one or the other EF</li> <li>📄 Role directed towards the Research Group</li> </ul> |                                                                                                            |                                                           |         |
|                                                                                                                                                                                                                                                                                                                                                                        |                                                                                                            | <b>CHANGE AGENT<br/>UNDERTAKING<br/>FACILITATION ROLE</b> |         |
| Ref.<br>in<br>add.<br>file 2                                                                                                                                                                                                                                                                                                                                           | FACILITATION ROLES                                                                                         | EF                                                        | IFT     |
| A4k                                                                                                                                                                                                                                                                                                                                                                    | Problem-solving and addressing specific issues                                                             | ■ ◆ 📄                                                     | ● ■     |
| A4l                                                                                                                                                                                                                                                                                                                                                                    | <i>Bringing problems reported off-meeting back to the group</i>                                            | ■                                                         | ◆       |
| A4m                                                                                                                                                                                                                                                                                                                                                                    | Acting as a liaison                                                                                        | ■ ◆ 📄 ❖                                                   | ● ■ ◆ ❖ |
| A4n                                                                                                                                                                                                                                                                                                                                                                    | Providing skills training                                                                                  | ■                                                         |         |
| A4o                                                                                                                                                                                                                                                                                                                                                                    | Being available as needed                                                                                  | ■ ◆                                                       | ■       |
| A4p                                                                                                                                                                                                                                                                                                                                                                    | <i>Meeting actors of change outside regular meetings</i>                                                   | ■ ◆ ❖                                                     | ■ ◆     |
| A4q                                                                                                                                                                                                                                                                                                                                                                    | <i>Establishing political links with/influencing stakeholders</i>                                          | ❖                                                         | ❖       |
| A5a                                                                                                                                                                                                                                                                                                                                                                    | Stimulating critical inquiry and assisting groups to develop/refine specific project-related questions     | ■                                                         |         |
| A5b                                                                                                                                                                                                                                                                                                                                                                    | Goal-setting and assisting with development of an action plan                                              | ■                                                         | ■ ◆     |
| A5c                                                                                                                                                                                                                                                                                                                                                                    | Helping identify and determine solutions to address potential barriers to project/change implementation    | ● ■ 📄                                                     | ■ ◆     |
| A5d                                                                                                                                                                                                                                                                                                                                                                    | <i>Considering the bigger picture (impact on other unit sites, legal aspects, etc.)</i>                    | ● ■                                                       | ❖       |
| A5e                                                                                                                                                                                                                                                                                                                                                                    | Thinking ahead in the process                                                                              | ■                                                         |         |
| A5f                                                                                                                                                                                                                                                                                                                                                                    | Gathering information and assembling/distributing reports and materials                                    | ■ 📄 ❖                                                     | ● ■ ◆ ❖ |
| A5g                                                                                                                                                                                                                                                                                                                                                                    | Providing regular communication (emails, phone calls)                                                      | ● ■ ◆ 📄 ❖                                                 | ■       |
| A5h                                                                                                                                                                                                                                                                                                                                                                    | <i>Performing/assisting with evaluation about implementation aspects</i>                                   | ■                                                         | ■ ◆     |
| A5i                                                                                                                                                                                                                                                                                                                                                                    | Making changes to the developed plan as necessary                                                          | ■                                                         | ■       |
| A5j                                                                                                                                                                                                                                                                                                                                                                    | Taking on specific tasks                                                                                   | ■ ❖                                                       | ■       |
| A5k                                                                                                                                                                                                                                                                                                                                                                    | <i>Asking for/acknowledging feedback about implementation</i>                                              | ■                                                         | ■ ◆     |
| A5l                                                                                                                                                                                                                                                                                                                                                                    | <i>Providing feedback about implementation</i>                                                             | ■ 📄                                                       | ● ■ ◆   |
| A5m                                                                                                                                                                                                                                                                                                                                                                    | <i>Leading the project</i>                                                                                 | ■                                                         | ■ ◆     |
| A5n                                                                                                                                                                                                                                                                                                                                                                    | Ensuring group remains on task and things are not missed                                                   | ■                                                         | ● ◆     |
| A5o                                                                                                                                                                                                                                                                                                                                                                    | <i>Discussing specific cases/experiences within the scope of the project</i>                               |                                                           | ■ ◆     |
| A5p                                                                                                                                                                                                                                                                                                                                                                    | Linking implementation actions to outcomes                                                                 |                                                           | ■ ◆     |
| A5q                                                                                                                                                                                                                                                                                                                                                                    | Keeping group members informed                                                                             | ■                                                         | ■ ◆ ❖   |
| A6a                                                                                                                                                                                                                                                                                                                                                                    | <i>Reflecting/planning on the “after-project” to consolidate improvements and institutionalize changes</i> | ■ ◆                                                       | ■ ◆     |
| B1a                                                                                                                                                                                                                                                                                                                                                                    | Organizing/scheduling meetings                                                                             | ● ■ ◆ 📄                                                   | ● ■ 📄   |
| B1b                                                                                                                                                                                                                                                                                                                                                                    | Preparing meeting agenda and minutes                                                                       | ■                                                         | ●       |
| B1c                                                                                                                                                                                                                                                                                                                                                                    | General administrative planning                                                                            | ■                                                         |         |
| B1d                                                                                                                                                                                                                                                                                                                                                                    | Leading/participating in meetings                                                                          | ■ ◆ 📄                                                     | ● ■ ◆   |
| B1e                                                                                                                                                                                                                                                                                                                                                                    | <i>Performing meeting evaluations</i>                                                                      | ■                                                         |         |
| B1f                                                                                                                                                                                                                                                                                                                                                                    | Tailoring/adapting facilitation services to the local setting                                              | ■                                                         |         |

| Table legend: Ref. Axx : Implementation-oriented facilitation roles                                                                                                                                                                                                                                                                                                    |                                                                            |                                                           |       |
|------------------------------------------------------------------------------------------------------------------------------------------------------------------------------------------------------------------------------------------------------------------------------------------------------------------------------------------------------------------------|----------------------------------------------------------------------------|-----------------------------------------------------------|-------|
| Ref. Bxx : Support-oriented facilitation roles                                                                                                                                                                                                                                                                                                                         |                                                                            |                                                           |       |
| <i>Italics</i> : Emerging role                                                                                                                                                                                                                                                                                                                                         |                                                                            |                                                           |       |
| <ul style="list-style-type: none"> <li>■ Role directed towards the IFT</li> <li>◆ Role directed towards the Family Medicine Group</li> <li>❖ Role directed towards other external change agents (e.g. clinicians, health agencies, support groups)</li> <li>● Role directed towards one or the other EF</li> <li>📄 Role directed towards the Research Group</li> </ul> |                                                                            |                                                           |       |
|                                                                                                                                                                                                                                                                                                                                                                        |                                                                            | <b>CHANGE AGENT<br/>UNDERTAKING<br/>FACILITATION ROLE</b> |       |
| Ref.<br>in<br>add.<br>file 2                                                                                                                                                                                                                                                                                                                                           | FACILITATION ROLES                                                         | EF                                                        | IFT   |
| B1g                                                                                                                                                                                                                                                                                                                                                                    | Encouraging/ensuring adequate participation during meetings                | ■                                                         | ■     |
| B1h                                                                                                                                                                                                                                                                                                                                                                    | <i>Establishing ground rules</i>                                           | ■                                                         | ■     |
| B1i                                                                                                                                                                                                                                                                                                                                                                    | <i>Assigning meeting maintenance roles</i>                                 | ■                                                         | ■     |
| B1j                                                                                                                                                                                                                                                                                                                                                                    | Promoting consensus-building (shared decision-making)                      | ● ■                                                       | ■     |
| B1k                                                                                                                                                                                                                                                                                                                                                                    | <i>Listening actively, clarifying and summarizing the information</i>      | ■                                                         |       |
| B2a                                                                                                                                                                                                                                                                                                                                                                    | <i>Welcoming/engaging new members in the team</i>                          | ■                                                         | ■     |
| B2b                                                                                                                                                                                                                                                                                                                                                                    | Building relationships                                                     | ■ ◆                                                       | ■ ◆   |
| B3a                                                                                                                                                                                                                                                                                                                                                                    | <i>Reporting/Managing conflict</i>                                         | ■ ◆ 📄                                                     | ●     |
| B3b                                                                                                                                                                                                                                                                                                                                                                    | Creating an open, supportive, and trusting environment conducive to change | ■                                                         | ● ■ ◆ |
| B3c                                                                                                                                                                                                                                                                                                                                                                    | <i>Observing group members' behaviors</i>                                  | ■                                                         |       |
| B3d                                                                                                                                                                                                                                                                                                                                                                    | Providing ongoing support/reassurance and constructive feedback            | ● ■ ◆                                                     | ● ■   |
| B4a                                                                                                                                                                                                                                                                                                                                                                    | Maintaining momentum and enthusiasm                                        | ■                                                         | ■     |
| B4b                                                                                                                                                                                                                                                                                                                                                                    | Acknowledging ideas and efforts                                            | ■                                                         | ● ■   |
| B4c                                                                                                                                                                                                                                                                                                                                                                    | Encouraging effective teamwork                                             | ■                                                         | ■     |
| B4d                                                                                                                                                                                                                                                                                                                                                                    | <i>Sharing benchmarking results from multiple sites to encourage team</i>  | ■                                                         |       |
| B4e                                                                                                                                                                                                                                                                                                                                                                    | Acknowledging success, recognizing and celebrating achievements            | ■                                                         | ■     |
| B5a                                                                                                                                                                                                                                                                                                                                                                    | Providing education, training, or coaching to develop individuals or group | ■                                                         |       |
